# Supplementary material
Source: PubMed Central journal article supplement (PMC2920490)
Supplement: NIHMS173168-supplement-1_si_001.pdf [file NIHMS173168-supplement-1_si_001.pdf]

# Supporting Information

## Cells on Pores: A Simulation-Driven Analysis of Transcellular Small Molecule Transport

Xinyuan Zhang<sup>†</sup>, Nan Zheng<sup>†</sup>, Peng Zou<sup>†</sup>, Huaning Zhu<sup>‡</sup>, Juan P. Hinstroza<sup>‡</sup>, and Gus R. Rosania<sup>\*†</sup>

<sup>†</sup> Department of Pharmaceutical Sciences  
University of Michigan College of Pharmacy  
428 Church Street  
Ann Arbor, MI 48109

<sup>‡</sup> Department of Fiber Science and Apparel Design  
Cornell University  
242 MVR Hall  
Ithaca, NY 14850  
Tel: 607 255 7600

<sup>\*</sup> Corresponding author :  
University of Michigan College of Pharmacy  
428 Church Street  
Ann Arbor, MI 48109  
Phone: (734)763-1032  
Fax: (734)615-6162  
E-mail: [grosania@umich.edu](mailto:grosania@umich.edu)

Running title: Cells on Pores

- Designed research: GR
- Performed research: XZ, NZ, PZ, HZ
- Contributed analytic tools: JH
- Analyzed data: GR, XZ, JH
- Wrote the paper: GR, XZ

## Supporting Table and Figure Legends

### Table S1. Parameter ranges used as input for Monte Carlo simulations

**Table S2. Simulation and quantitative experimental data of CQ transport across MDCK cells on polyester membranes of varying porosity, at donor compartment pH 6.5 and 7.4.** The prefix ‘sim.’ indicates simulation data corresponding to 10%, 50%, and 90% quantiles of simulated  $dM/dt$  ( $10^{-6}$  pmol/sec/cell),  $P_{cell}$  ( $10^{-6}$  cm/sec),  $P_{app}$  ( $10^{-6}$  cm/sec) and intracellular mass accumulation ( $10^{-3}$  pmol/cell) at the end of the 5th minute, using the parameters in Table S1 (non-lysosomal swelling cells). The prefix ‘exp.’ indicates the experimental data.

**Figure S1: CQ mass accumulation in the receiver compartment with time for different experimental conditions.** Initial concentration was 1mM except for AP→BL transport, pH=6.5 on 0.4 $\mu$ m membrane which with a initial concentration of 2.5mM. Three lines indicate 10%, 50%, and 90% quantiles of Monte Carlo simulations, respectively. Symbols indicate experimental measured mass change in the receiver compartment with time. Experiments performed on different days were pooled together.

**Figure S2. Cell images stained with Hoechst 33342 after transport experiments.** (A) Images were taken for AP→BL transport. (B) Images were taken for BL→AP transport. Images in the same row were taken for the transport experiments with the same concentration in the donor compartment. Images in the same column were taken for the transport experiments with the same type of membrane and pH value in the donor compartment.

**Figure S3. Binding of mono- and di-cationic species of CQ to resident, anionic macromolecules and phospholipids, can account for observed accumulation during 4 hour incubation period.** Monte Carlo simulations were performed the same as before except that  $\log K_d = \log K_{dd} = 2.3$  (calculation was described in Method) were used instead of  $\log P_{d1} = [-0.07, 0.93]$  and  $\log P_{d1} = [-1.41, -0.41]$  (Table S1) in equation 17 of reference 1 in cytosol, lysosomes, and mitochondria, i.e. the adsorption coefficient  $K_d = L \times 1.22 \times 10^{2.3}$  for mono- and di-cationic species of CQ, where  $L$  is the lipid fraction in each compartment. The lipid fraction was fixed as 5% in these simulations. Thus the adsorption coefficient for mono- and di-cationic species of CQ was also fixed as above. X-axis indicates  $\log_{10}$  (intracellular mass, pmol/cell) and y-axis indicates density. Red solid lines indicate mean values of measured intracellular accumulation of CQ (pmol/cell) after 4 hours incubation with initial concentration of 1mM. Red dashed lines indicate standard deviation. Simulations were also performed with initial concentration of 1mM. The first and third columns indicate simulations without lysosomal swelling or intra-lysosomal pH increment. The second and fourth columns indicate simulation with lysosomal swelling and intra-lysosomal pH increment.

**Figure S4. Parametric sensitivity analysis.** For each individual parametric analysis, one parameter was changed and other parameters were fixed at mean values in Table S1. Unit

for concentration is mM, for intracellular mass (Intra. Mass) is pmol/cell, for permeability ( $P_{\text{cell}}$  and  $P_{\text{app}}$ ) is  $10^{-6}$ cm/sec, and for transport rate (dM/dt) is  $10^{-6}$ pmol/sec/cell.

**Table S1.**

|                                                |                                                                                                                                                                            |
|------------------------------------------------|----------------------------------------------------------------------------------------------------------------------------------------------------------------------------|
| $\log P_n$                                     | [3.43, 4.43]                                                                                                                                                               |
| $pK_{a1}$                                      | [9.46, 10.46]                                                                                                                                                              |
| $pK_{a2}$                                      | [6.97, 7.97]                                                                                                                                                               |
| $\log P_{d1}$                                  | [-0.07, 0.93]                                                                                                                                                              |
| $\log P_{d2}$                                  | [-1.41, -0.41]                                                                                                                                                             |
| cell number / insert                           | [ $2 \times 10^5$ , $4 \times 10^5$ ]                                                                                                                                      |
| pore density<br>(pore number / $\text{cm}^2$ ) | [ $3.2 \times 10^6$ , $4.8 \times 10^6$ ] for membranes with 0.4 $\mu\text{m}$ pores<br>[ $1.6 \times 10^6$ , $2.4 \times 10^6$ ] for membranes with 3 $\mu\text{m}$ pores |
| $A_a$ ( $\mu\text{m}^2$ )                      | [100, 1000]                                                                                                                                                                |
| $A_{\text{insert}}$ ( $\text{cm}^2$ )          | 1.12                                                                                                                                                                       |
| $A_{\text{pore}}$ ( $\mu\text{m}^2$ )          | <b>average pore area/cell = <math>\frac{\text{cell number/insert}}{\text{pore density} \times A_{\text{insert}}} \times \text{area of single pore}</math></b>              |
| $A_b$ ( $\mu\text{m}^2$ )                      | [ $A_{\text{pore}}$ , 100]                                                                                                                                                 |
| $V_c$ ( $\mu\text{m}^3$ )                      | [500, 3000]                                                                                                                                                                |
| <sup>b</sup> $V_l$ ( $\mu\text{m}^3$ )         | [9.24, 23.8] / [196.5, 906.3]                                                                                                                                              |
| $V_m$ ( $\mu\text{m}^3$ )                      | [10.48, 262]                                                                                                                                                               |
| <sup>a</sup> $A_l$ ( $\mu\text{m}^2$ )         | 314                                                                                                                                                                        |
| <sup>a</sup> $A_m$ ( $\mu\text{m}^2$ )         | 314                                                                                                                                                                        |
| <sup>a</sup> $V_b$ ( $\mu\text{m}^3$ )         | 1.5mL for AP->BL transport, volume of donor compartment<br>0.5mL for BL->AP transport, volume of donor compartment                                                         |
| $E_a$ (mV)                                     | [-14.3, -4.3]                                                                                                                                                              |
| $E_l$ (mV)                                     | [5, 15]                                                                                                                                                                    |
| $E_b$ (mV)                                     | [6.9, 16.9]                                                                                                                                                                |
| <sup>a</sup> $E_m$ (mV)                        | -160mV                                                                                                                                                                     |
| $\text{pH}_c$                                  | [7.0, 7.4]                                                                                                                                                                 |
| <sup>c</sup> $\text{pH}_l$                     | [4.8, 5.2] / [4.63, 6.37]                                                                                                                                                  |
| $\text{pH}_m$                                  | [7.8, 8.2]                                                                                                                                                                 |
| $\text{pH}_a$                                  | [7.0, 7.4] for pH=7.4 in the donor compartment<br>[6.4, 6.6] for pH=6.5 in the donor compartment                                                                           |
| $L_c$                                          | [0.05, 0.15]                                                                                                                                                               |
| $L_m$                                          | [0.05, 0.15]                                                                                                                                                               |
| $L_l$                                          | [0.05, 0.15]                                                                                                                                                               |
| <sup>a</sup> $\text{pH}_{a/b}$                 | 7.4; pH value in the receiver compartment                                                                                                                                  |

<sup>a</sup> indicates parameters that do not influence permeability or intracellular accumulation calculations shown by performing parametric studies

<sup>b</sup> Uniform distribution upper and lower boundaries for lysosomal volume were calculated based on experimental measurement and calculated as described below. The measured lysosomal volume was calculated by equation (s)E1 using measured number and diameter of lysosomes.

$$V_l = n \times \left(\frac{1}{6} \pi (d)^3\right), \text{ (s)E1}$$

where  $n$  is the number of lysosomes / cell, and  $d$  is the diameter of a lysosome. The average number of lysosomes per cell was  $200 \pm 35$  ( $n = 6$ ) and  $253 \pm 45$  ( $n = 5$ ) for treated (50 $\mu$ M CQ for 4hours) and untreated cells, respectively. The diameter of lysosomes was  $1.74 \pm 0.19 \mu\text{m}$  ( $n = 6$ ) and  $0.50 \pm 0.03 \mu\text{m}$  ( $n = 5$ ) for treated (50 $\mu$ M CQ for 4hours) and untreated cells, respectively. Thus the measured lysosomal volume was  $551.4 \pm 204.9$  and  $16.5 \pm 4.19 \mu\text{m}^3$  (mean  $\pm$  SD) for treated and untreated cells, respectively. The standard deviation of lysosomal volume was estimated by equation (s)E2 (partial derivative method for error propagation estimation)<sup>2</sup> assuming there is no correlation between  $n$  and  $d$ .

$$SD_{V_l} = \sqrt{\left(\frac{\partial V_l}{\partial n}\right)^2 SD_n^2 + \left(\frac{\partial V_l}{\partial d}\right)^2 SD_d^2}, \text{ (s)E2}$$

The equations (s)E3 and (s)E4 were applied to calculate the upper (b) and lower (a) boundaries of the uniform distribution of  $V_l$ .

$$\text{mean} = \frac{1}{2}(a + b), \text{ (s)E3}$$

$$\text{variance} = \frac{1}{12}(b - a)^2, \text{ (s)E4}$$

By plugging in the above measurement, uniform distribution [9.24, 23.8] and [196.5, 906.3]  $\mu\text{m}^3$  were used for  $V_l$  for untreated and treated cells, respectively.

<sup>c</sup> Uniform distribution upper and lower boundaries of lysosomal pH for Monte Carlo Simulations with CQ-expanded lysosomal volume (Figure 6) were calculated as the following. The measured mean value and maximum standard deviation are 5.5 and 0.5, respectively. Thus the variance is 0.25. The upper (b) and lower (a) boundaries of the distributions were calculated from equations (s)E3 and (s)E4, which are derived for uniform distribution probability function. Thus uniform distribution [4.63, 6.37] was set for pH in lysosomes of cells under 50  $\mu$ M CQ treatment.

Table S2.

|                                                                        | pH = 6.5, 0.4 $\mu$ m |       |       | pH = 6.5, 3 $\mu$ m |       |       | pH = 7.4, 0.4 $\mu$ m |       |       | pH = 7.4, 3 $\mu$ m |      |      |
|------------------------------------------------------------------------|-----------------------|-------|-------|---------------------|-------|-------|-----------------------|-------|-------|---------------------|------|------|
|                                                                        | 10%                   | 50%   | 90%   | 10%                 | 50%   | 90%   | 10%                   | 50%   | 90%   | 10%                 | 50%  | 90%  |
| <b>A. overall effects of parameters (AP<math>\rightarrow</math>BL)</b> |                       |       |       |                     |       |       |                       |       |       |                     |      |      |
| sim.dM/dt                                                              | 1.78                  | 7.75  | 23.7  | 5.00                | 12.0  | 31.3  | 11.7                  | 54.7  | 229   | 29.2                | 91.8 | 321  |
| exp.dM/dt                                                              | 2.20 $\pm$ 0.718      |       |       | 5.19 $\pm$ 1.01     |       |       | 22.8 $\pm$ 0.741      |       |       | 46.6 $\pm$ 6.28     |      |      |
| sim.P <sub>cell</sub>                                                  | 91.0                  | 407   | 1264  | 9.26                | 22.6  | 59.7  | 602                   | 2904  | 12401 | 54.1                | 172  | 612  |
| exp. P <sub>cell</sub>                                                 | 218 $\pm$ 34.4        |       |       | 14.0 $\pm$ 3.33     |       |       | 1560 $\pm$ 161        |       |       | 85.9 $\pm$ 15.6     |      |      |
| sim.P <sub>app</sub>                                                   | 0.455                 | 2.04  | 6.24  | 1.31                | 3.17  | 8.35  | 3.04                  | 14.5  | 62.3  | 7.64                | 23.9 | 84.4 |
| exp.P <sub>app</sub>                                                   | 1.35 $\pm$ 0.442      |       |       | 1.98 $\pm$ 0.471    |       |       | 7.85 $\pm$ 0.810      |       |       | 12.1 $\pm$ 2.21     |      |      |
| sim.mass                                                               | 0.490                 | 1.04  | 2.16  | 0.451               | 0.971 | 2.03  | 3.14                  | 7.61  | 18.0  | 2.99                | 7.23 | 17.8 |
| exp.mass                                                               | 3.73 $\pm$ 0.14       |       |       | 1.88 $\pm$ 0.54     |       |       | 8.72 $\pm$ 0.94       |       |       | 8.90 $\pm$ 0.26     |      |      |
| <b>B. overall effects of parameters (BL<math>\rightarrow</math>AP)</b> |                       |       |       |                     |       |       |                       |       |       |                     |      |      |
| sim.dM/dt                                                              | 1.70                  | 7.42  | 22.9  | 4.88                | 12.0  | 30.9  | 10.7                  | 52.9  | 214   | 27.2                | 84.6 | 309  |
| exp.dM/dt                                                              | 5.25 $\pm$ 1.24       |       |       | 7.12 $\pm$ 0.473    |       |       | 29.4 $\pm$ 1.54       |       |       | 63.8 $\pm$ 15.9     |      |      |
| sim.P <sub>cell</sub>                                                  | 85.4                  | 390   | 1228  | 9.10                | 22.3  | 58.9  | 548                   | 2767  | 11616 | 50.8                | 159  | 585  |
| exp. P <sub>cell</sub>                                                 | 382 $\pm$ 81.7        |       |       | 15.8 $\pm$ 2.45     |       |       | 2000 $\pm$ 353        |       |       | 114 $\pm$ 19.0      |      |      |
| sim.P <sub>app</sub>                                                   | 0.439                 | 1.96  | 6.19  | 1.28                | 3.13  | 8.18  | 2.77                  | 13.8  | 57.4  | 7.11                | 22.4 | 82.3 |
| exp.P <sub>app</sub>                                                   | 1.92 $\pm$ 0.411      |       |       | 2.24 $\pm$ 0.346    |       |       | 10.0 $\pm$ 1.77       |       |       | 16.2 $\pm$ 2.69     |      |      |
| sim.mass                                                               | 0.020                 | 0.091 | 0.309 | 0.060               | 0.151 | 0.425 | 0.137                 | 0.679 | 2.56  | 0.378               | 1.11 | 3.56 |
| exp.mass                                                               | 3.52 $\pm$ 0.93       |       |       | 4.94 $\pm$ 1.06     |       |       | 8.28 $\pm$ 0.75       |       |       | 11.8 $\pm$ 1.9      |      |      |

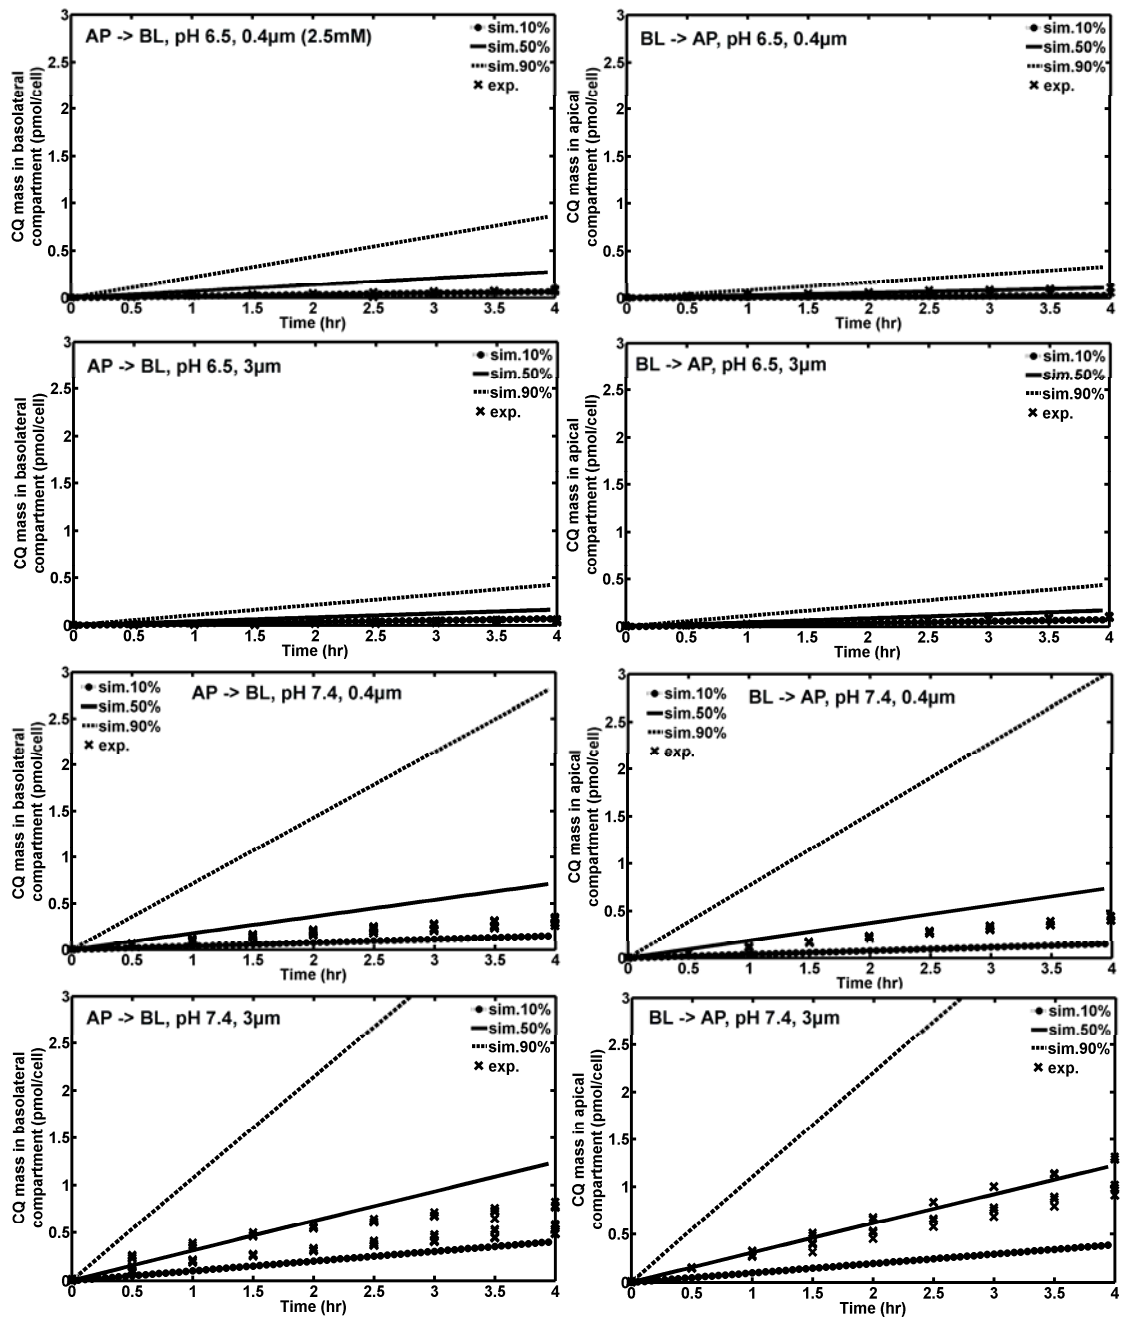

Figure S1.

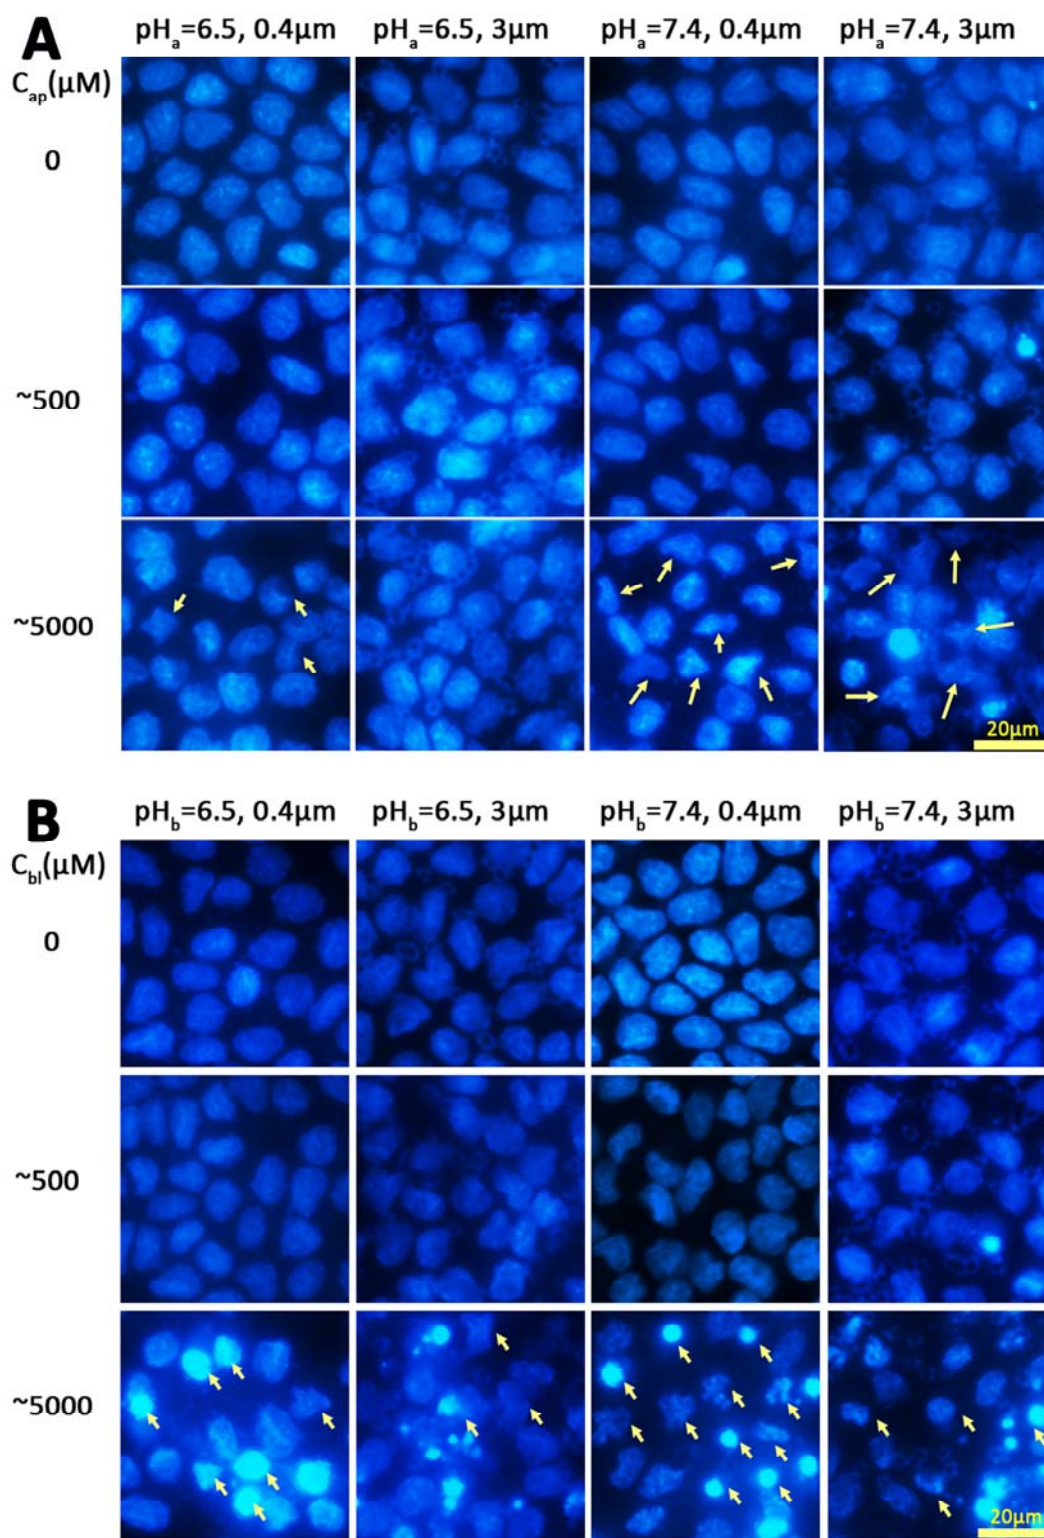

Figure S2.

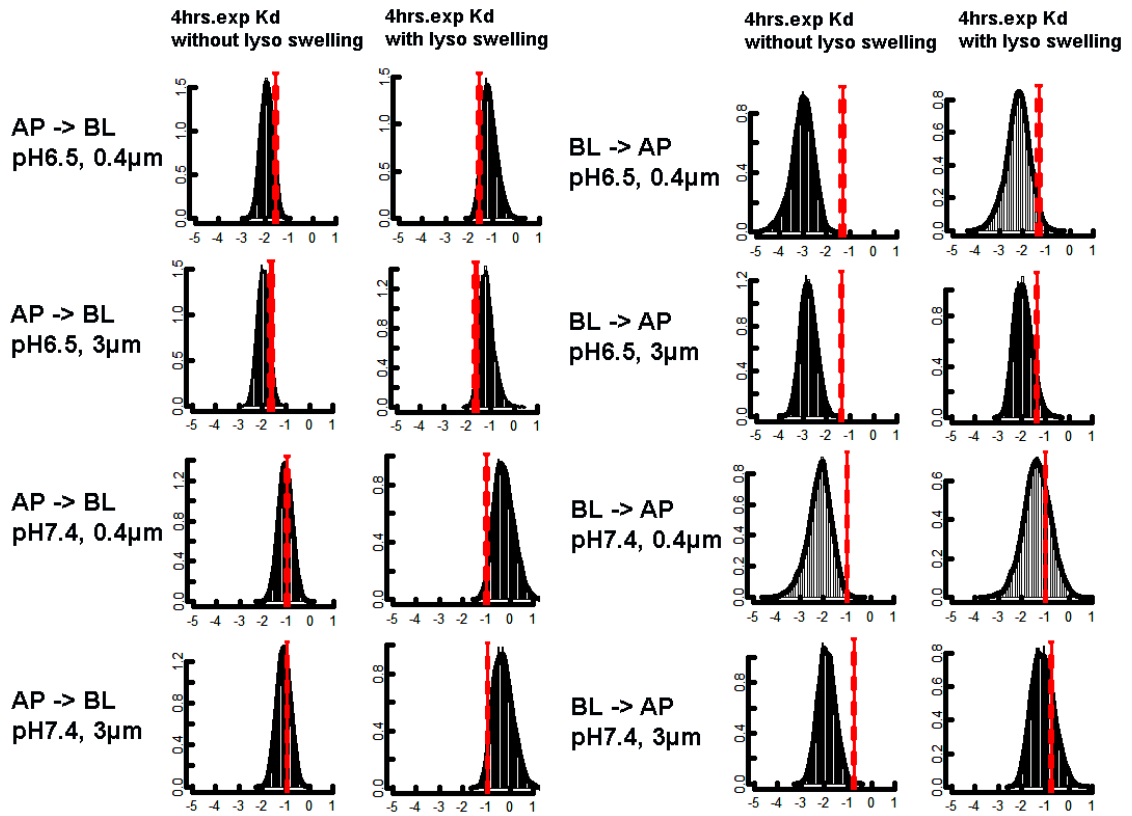

Figure S3.



## Parameter Sensitivity Analysis Plots

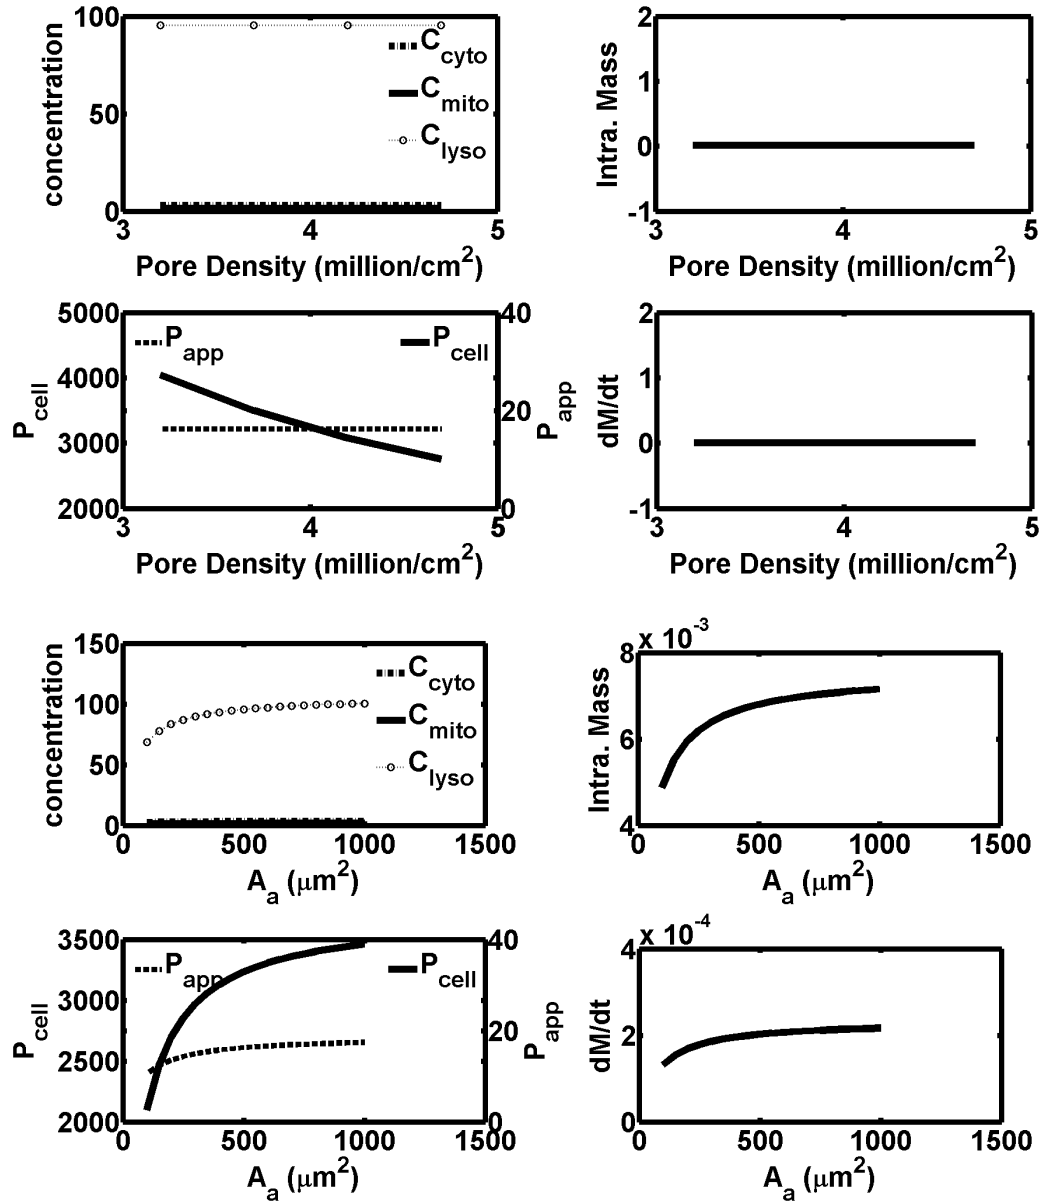

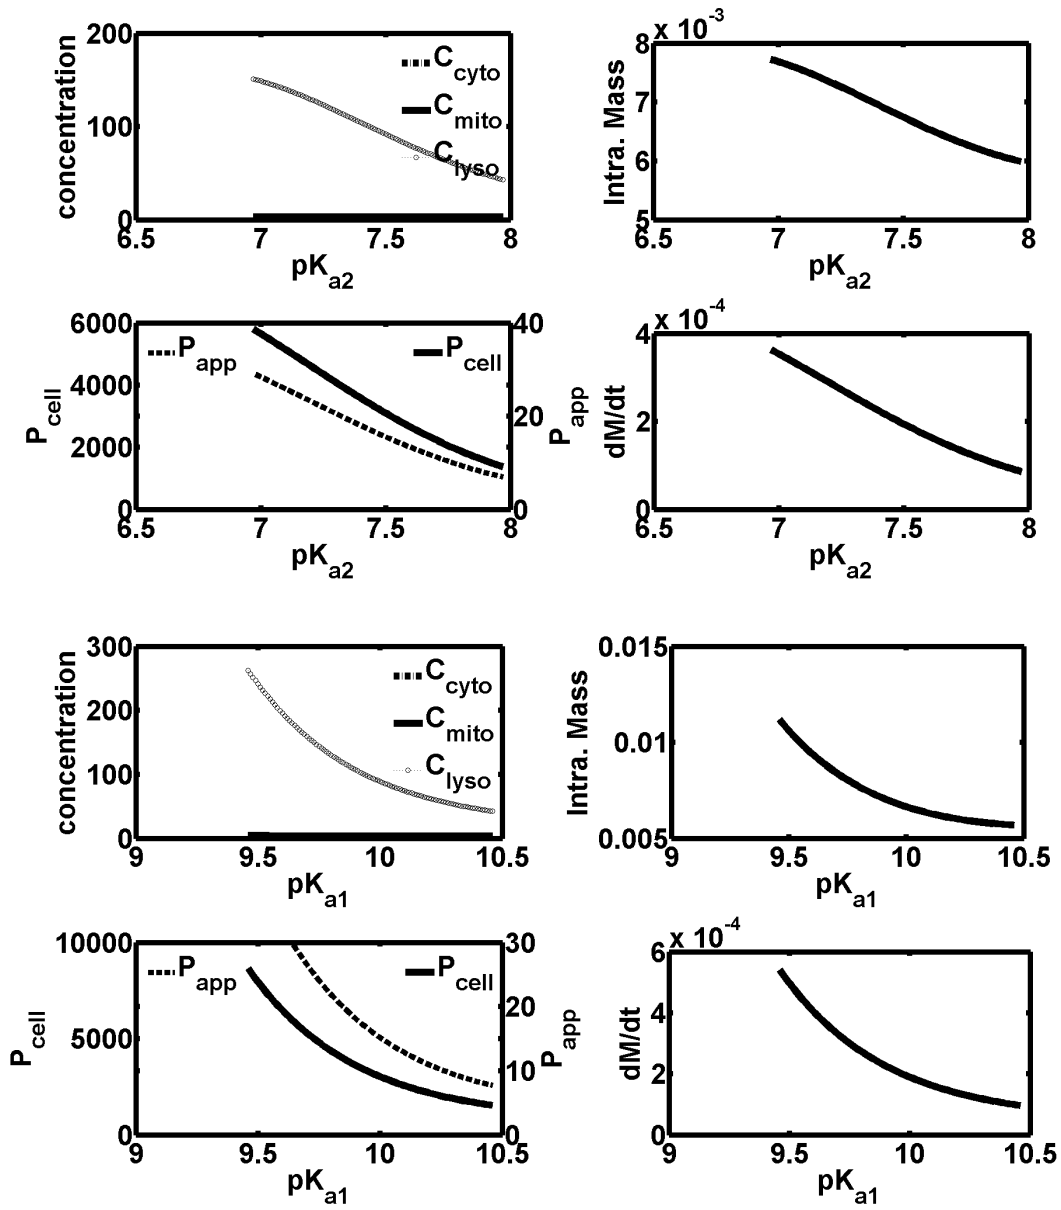

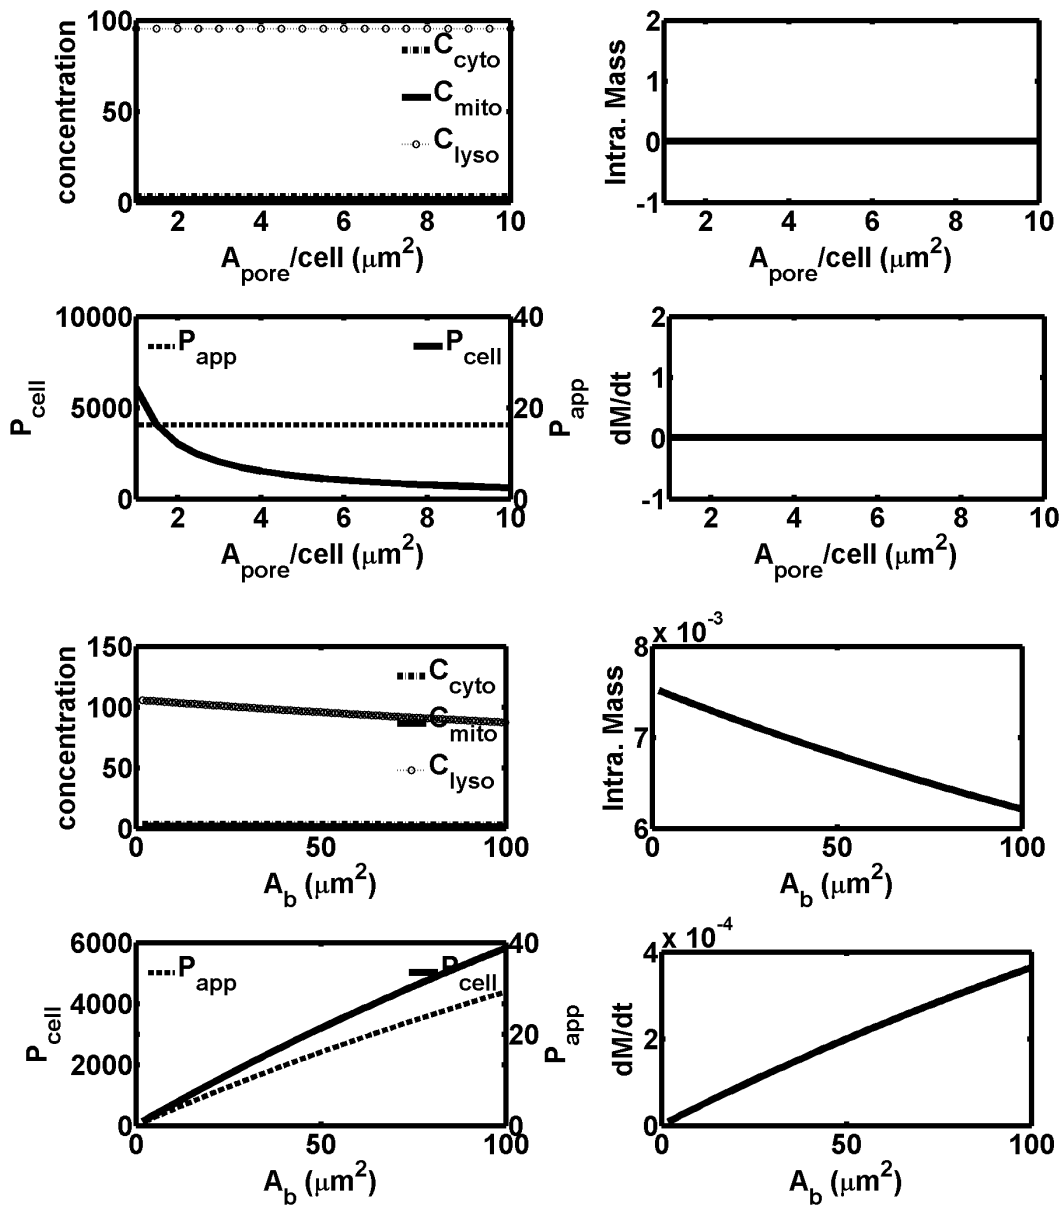

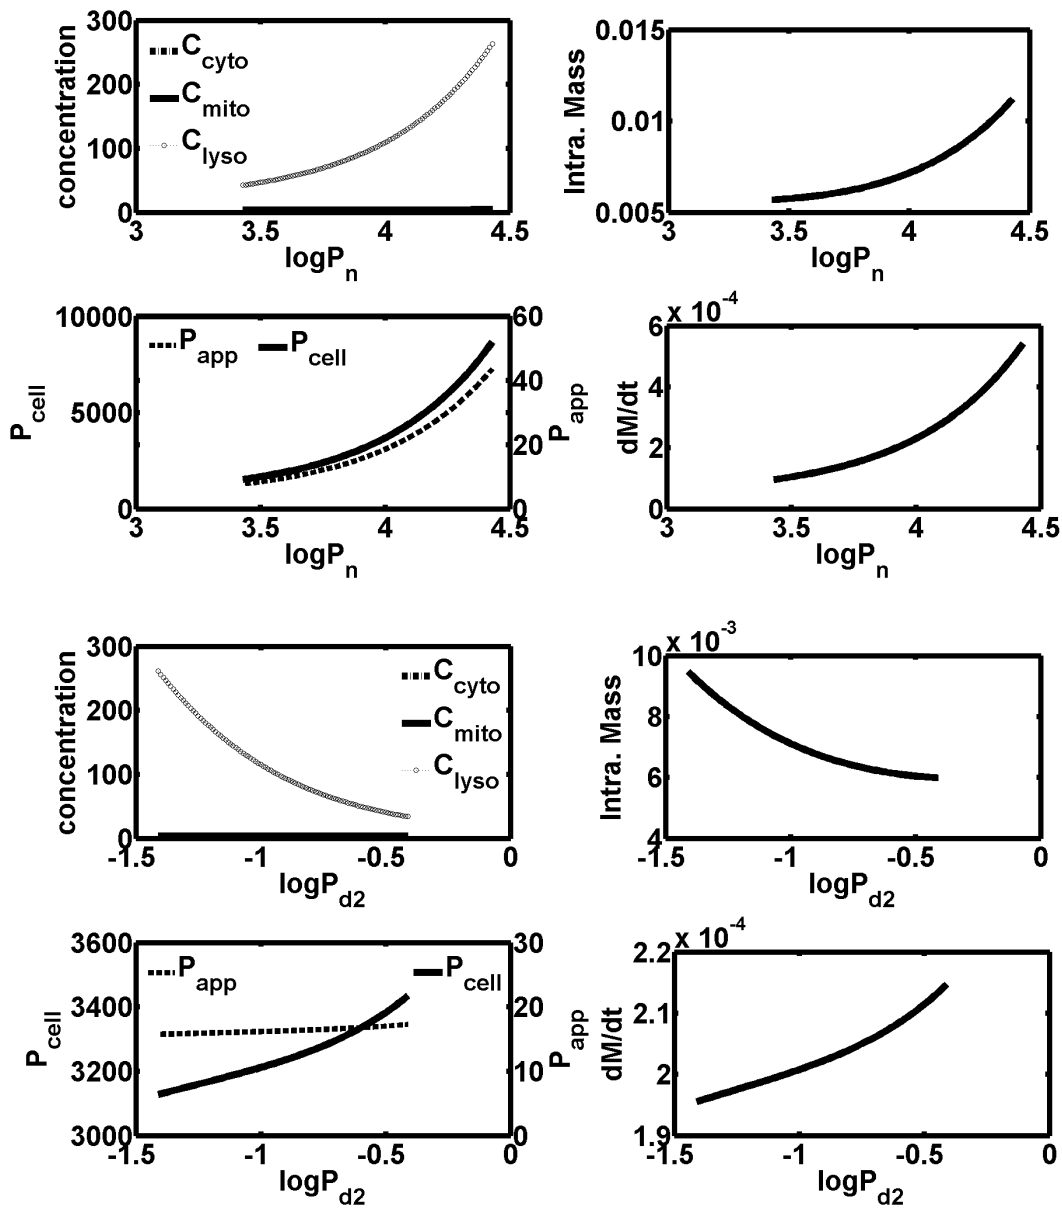

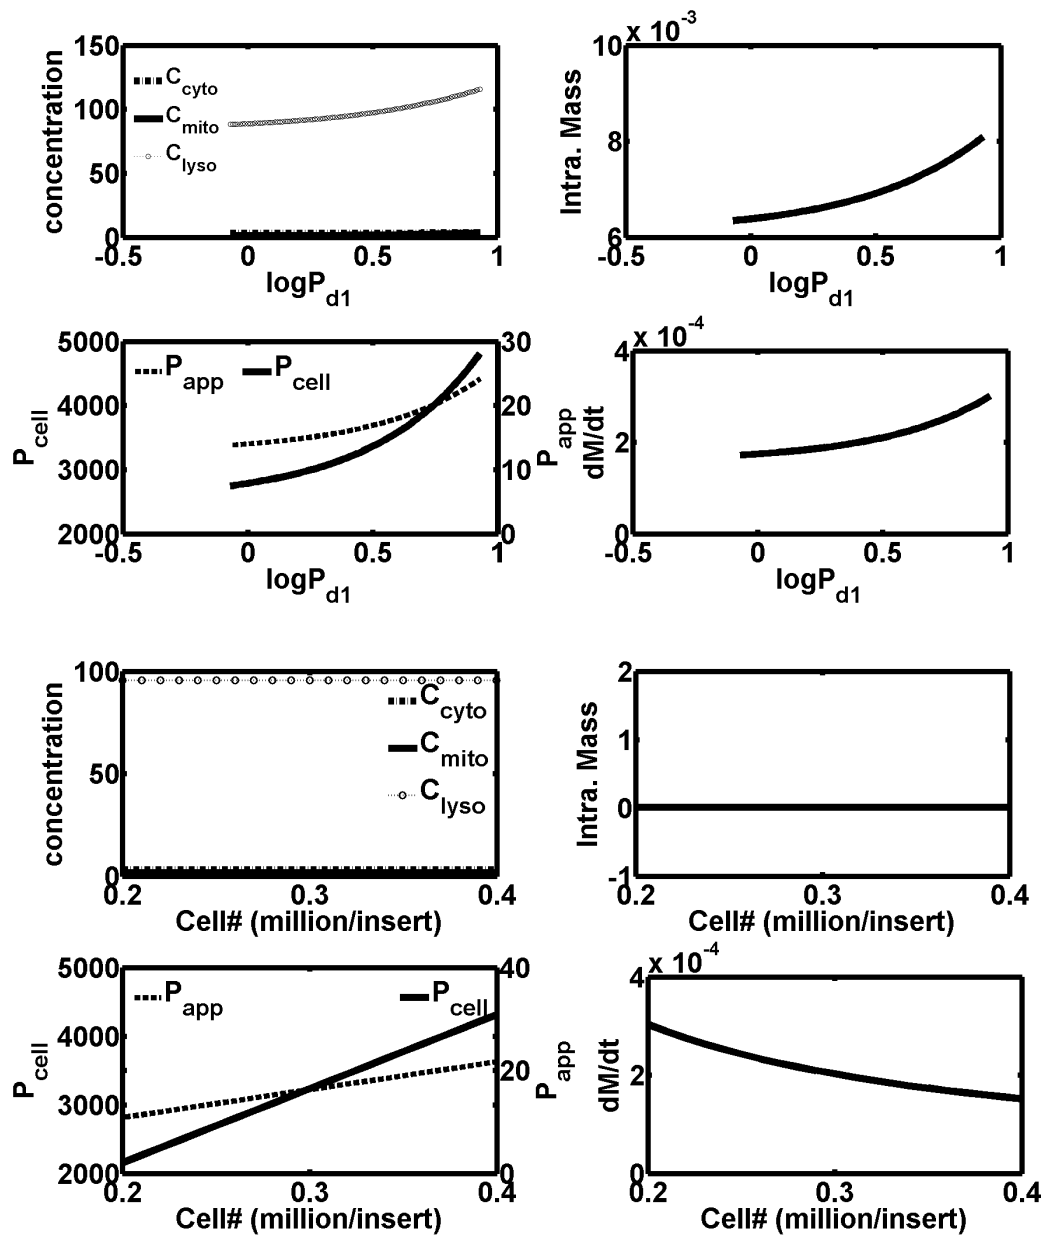

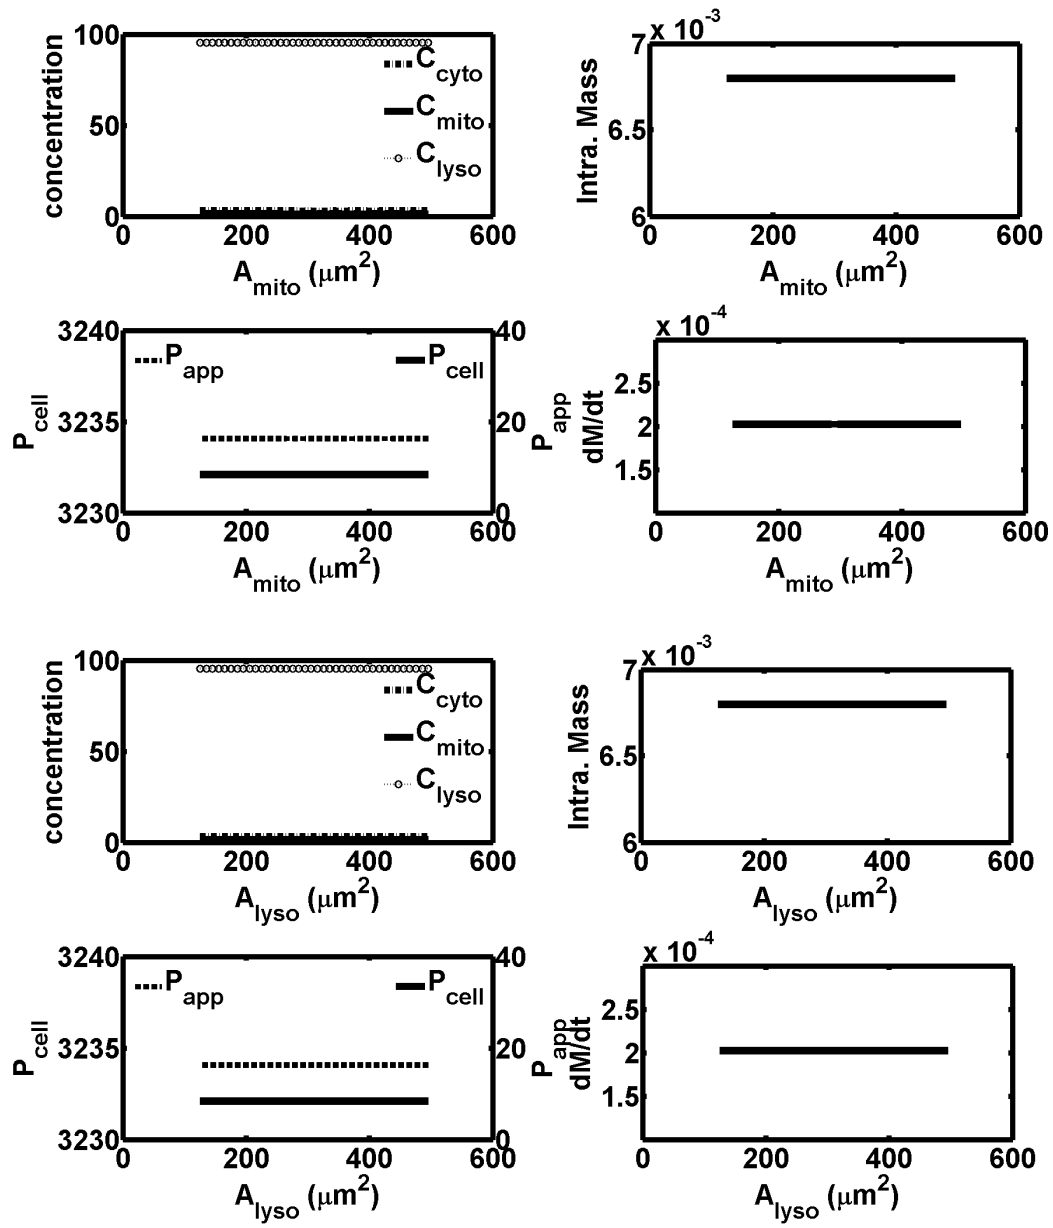

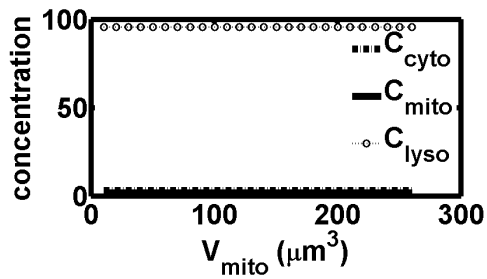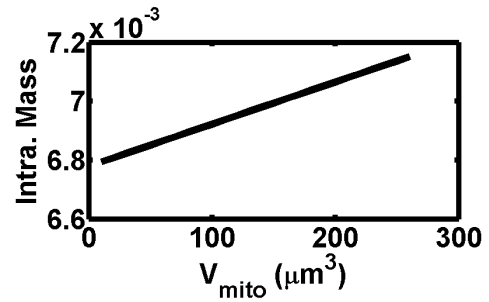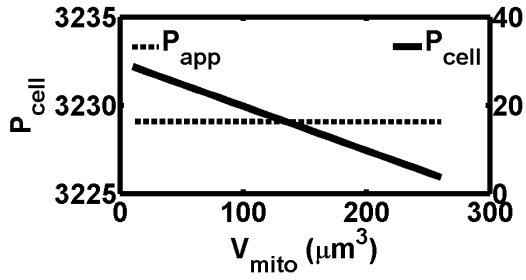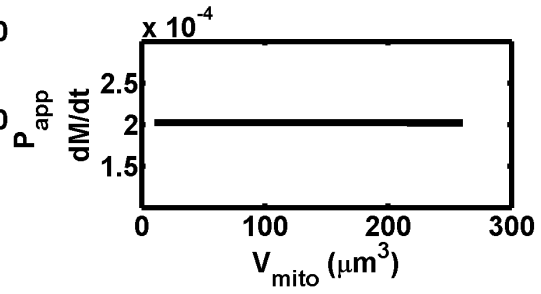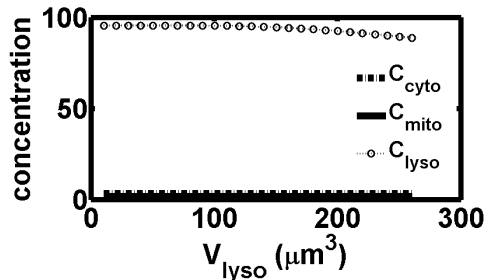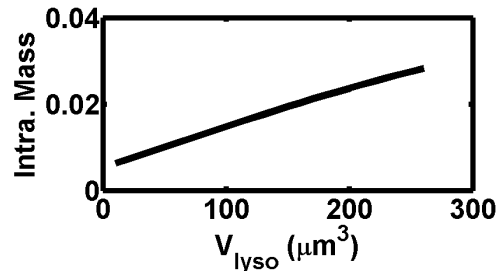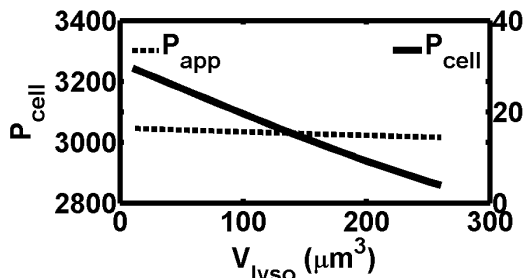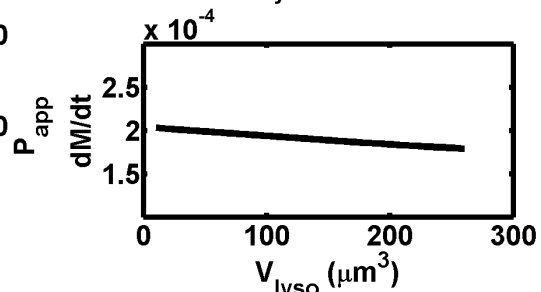

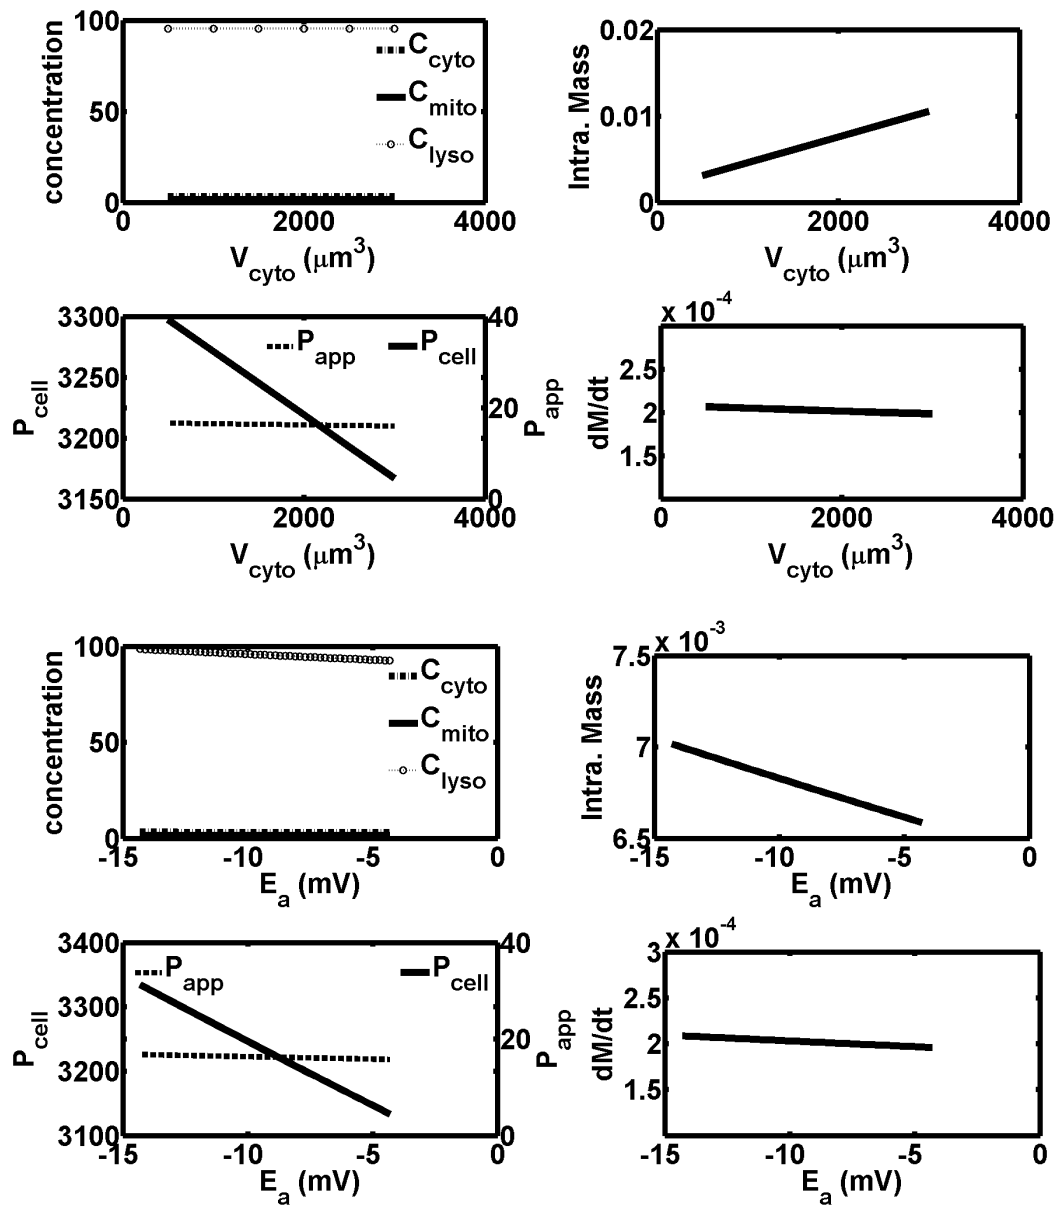



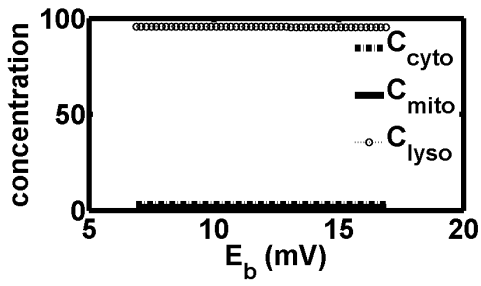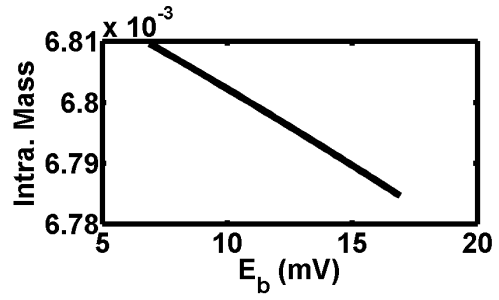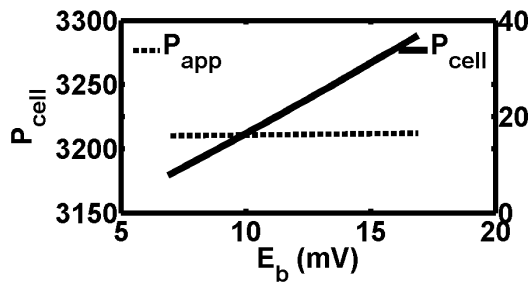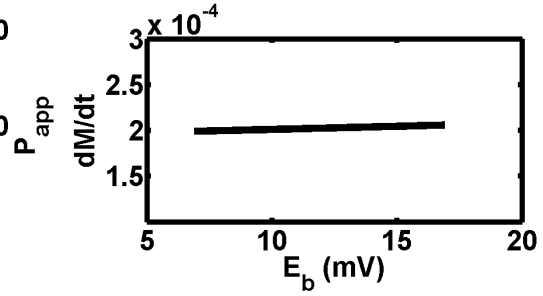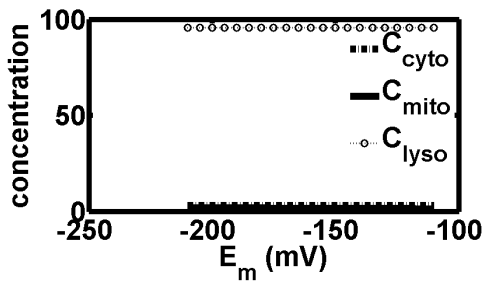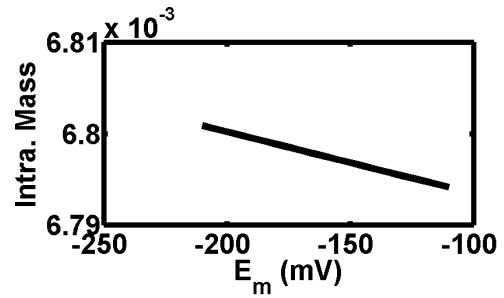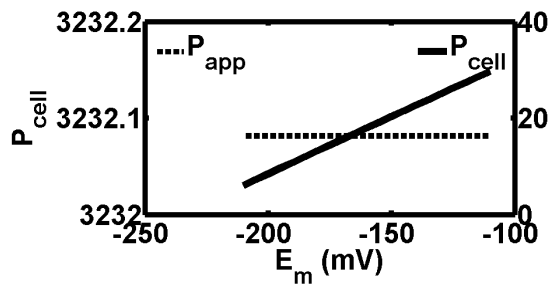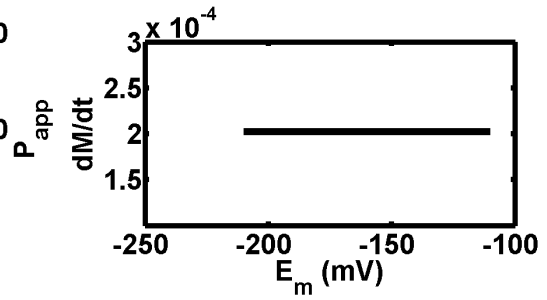

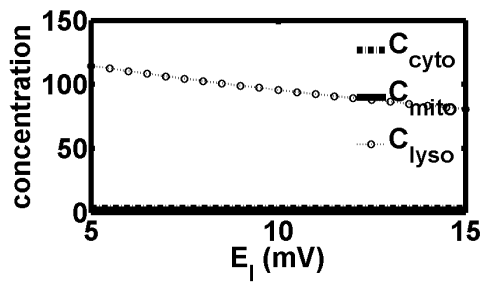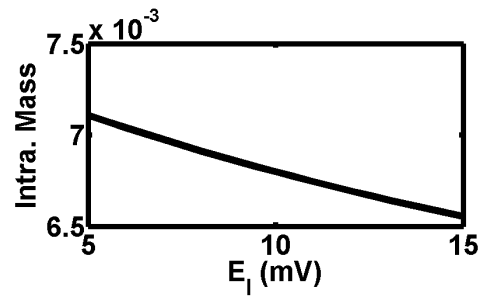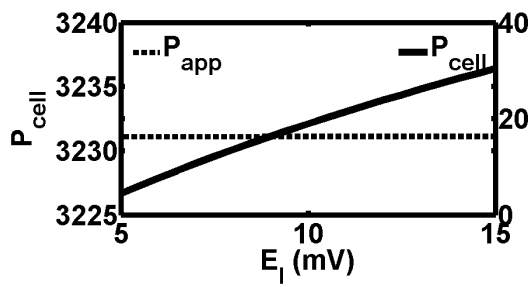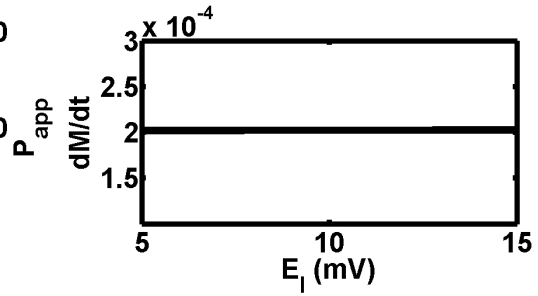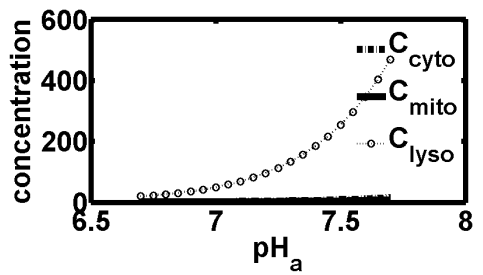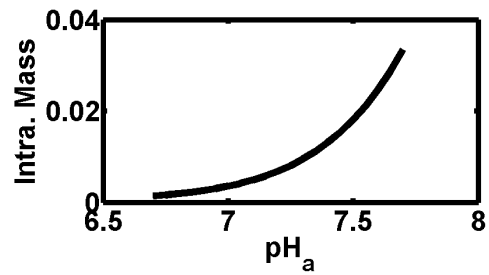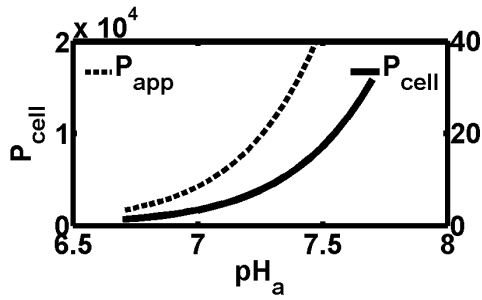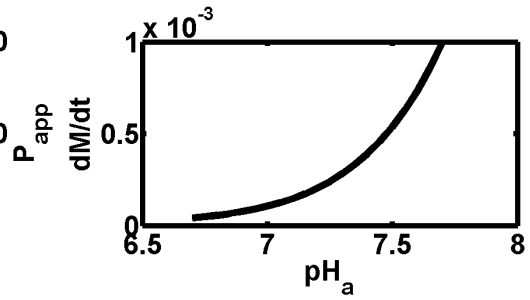

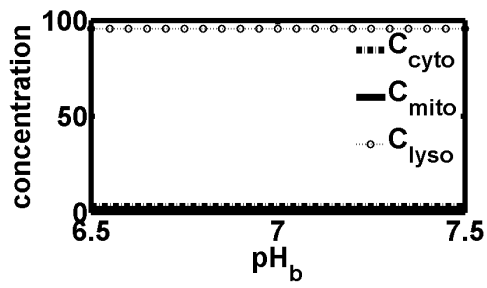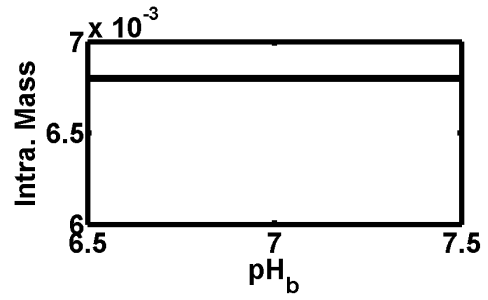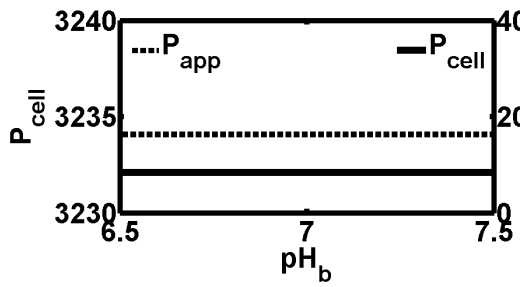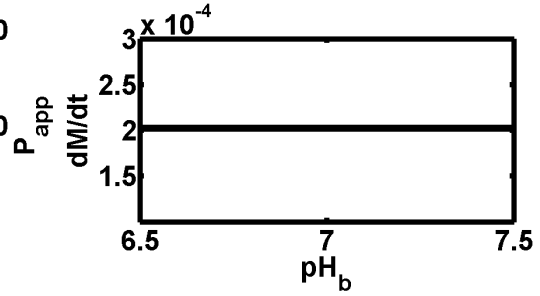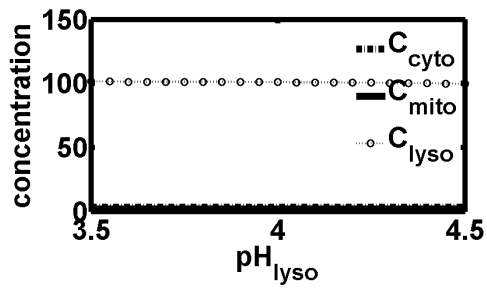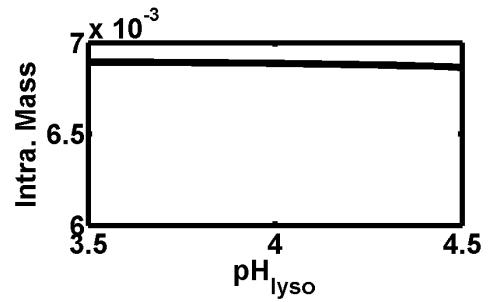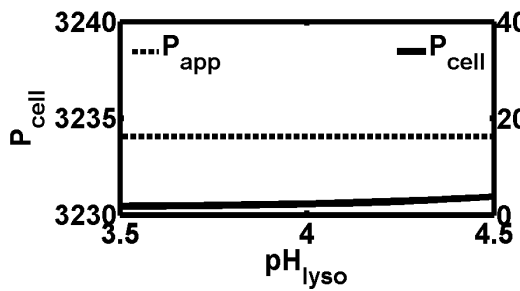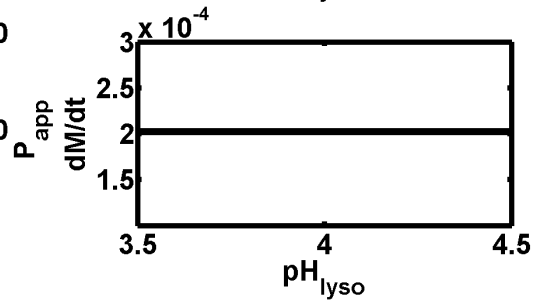

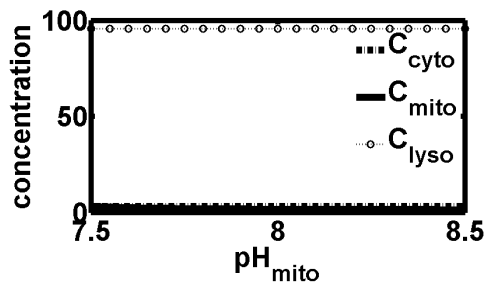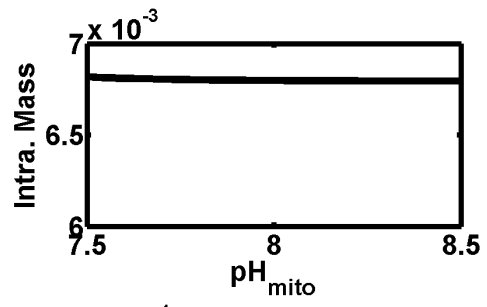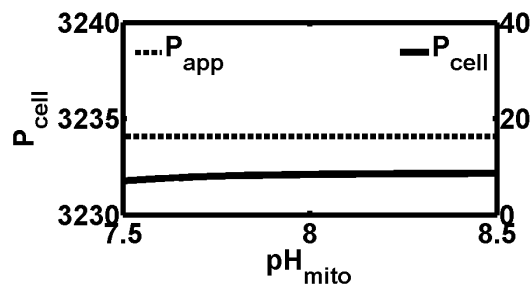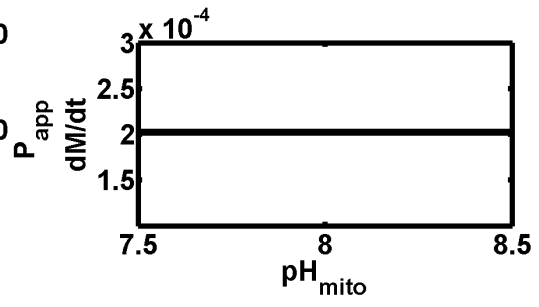

**Reference:**

1. Zhang, X.; Shedden, K.; Rosania, G. R. A cell-based molecular transport simulator for pharmacokinetic prediction and cheminformatic exploration. *Mol Pharm* **2006**, 3, (6), 704-16.
2. Ku, H. Notes on the Use of Propagation of Error Formulas, J Research of National Bureau of Standards-C. Engineering and Instrumentation, Vol. 70C, No.4, pp. 263-273. **1966**.
